# Supplementary material
Source: PubMed Central journal article supplement (PMC4565187)
Supplement: NIHMS715201-supplement-Supp_TableS1-S4___FigureS1-S4.pdf [file NIHMS715201-supplement-Supp_TableS1-S4___FigureS1-S4.pdf]

**Supplementary Table S1: RT-qPCR probes and primers.**

Clock forward AGGCATGTCACAGTTTCAGC  
Clock reverse CTTCTTGCTGCCGATGAATA  
Clock probe CATGCGTGTCGCTGCTCTAGC  
Arntl forward TAAACTCACCGTGCTCAGGA  
Arntl reverse GTGTTTCAGTTCGTCATCGG  
Arntl probe TTGAGAGGTGCCACCAACCCA  
Npas2 forward CTGGAGAAGGTCATCGGATT  
Npas2 reverse TCTAACGCCTCCAACATCAG  
Npas2 probe CCAGCAGGACTGGAAGCCTTCA  
Per2 forward TCGACGTAACAGGGTGTGTT  
Per2 reverse TCCTCTTTGGCTTCTGAGGT  
Per2 probe CCCAGGGAAGGACTGTCTTCCTCA  
Igfbp2 forward CTACAACGAGCAGCAGGAGA  
Igfbp2 reverse AACTGGGAAATCCTCCACAC  
Igfbp2 probe AAGCCAGGCACCGACTGGCT  
Sds forward TTCAAGATCCGAGGCATTG  
Sds reverse GCTGAAGAGCAGACGAAATG  
Sds probe TTGCCTTCATCTTGCAGAGATGCC  
Got1 forward AAGACATTCGGTCCTATCGC  
Got1 reverse CAGGAGCATTCTCCAGATCA  
Got1 probe TCAAGTCCTCTCTTCTCTGCATCCCA  
Akr1b7 forward GTGACCAATCAGGTCGAGTG  
Akr1b7 reverse GGCTTAGCATAAGGCCTGTC  
Akr1b7 probe ACTCCAAGGGCATCGCGGTC  
Acss2 forward CATTGTGTTTGCAGGCTTCT  
Acss2 reverse CAGCTCCTTCAGGTCACAA  
Acss2 probe TTCCAGCTGCTGCCTGCTCA  
Zfp189 forward TGTGGCTGCTATTCCTGAAG  
Zfp189 reverse AAACATCCAGCGAGACCAG  
Zfp189 probe ACCCTGTGGTTCGATGTCTTTCTCAA  
Apol3 forward CGCCAGAGTCTTGAGGAAAC  
Apol3 reverse CACTTTCAGGCTTCGTCTT  
Apol3 probe AAGACCTGCAGCTCCTGTTGACCA  
Wdm1 forward CAGTGAGACCTCTGCAGCTT  
Wdm1 reverse CAGGTAGAAGCTGTTCTTAGCTTG  
Wdm1 probe CCCAGTCGCCACTGCAGAGC  
Snora5 forward GGAAGTGGCCTAGATGGCT  
Snora5 reverse CAGTGTCTGCAGCCAACTT  
Snora5 probe CCCAGAGCCCATGAGCAGCA  
Rpl13a ABI/Invitrogen Rn00821946\_g1  
Rn45s ABI/Invitrogen Rn03928990\_g1  
18s ABI/Invitrogen 4319413E

**Supplementary Table S2. 144 significantly differentially expressed liver genes in p21 male offspring: Con vs IPCR.**

| <b>Probe set</b> | <b>Gene<sup>a</sup></b> | <b>Con mean<sup>b,c</sup></b> | <b>IPCR mean<sup>b,c</sup></b> | <b>Difference of means<sup>c</sup></b> | <b>p-value</b> |
|------------------|-------------------------|-------------------------------|--------------------------------|----------------------------------------|----------------|
| 10762324         | Sds                     | 7.6                           | 11.1                           | 3.5                                    | 0.00201        |
| 10924223         | Igfbp2                  | 7.8                           | 11.2                           | 3.4                                    | 0.001754       |
| 10791250         | Lpl                     | 7.5                           | 10.7                           | 3.2                                    | 0.000416       |
| 10815281         | Ccrn4lb                 | 6.3                           | 9.5                            | 3.1                                    | 0.001567       |
| 10775952         | Afp                     | 9                             | 11.4                           | 2.4                                    | 0.003339       |
| 10881861         | Per3                    | 7.6                           | 9.8                            | 2.2                                    | 0.001294       |
| 10706953         | Dbp                     | 8.6                           | 10.8                           | 2.2                                    | 0.001064       |
| 10715364         | Got1                    | 10.3                          | 12.4                           | 2.2                                    | 0.001804       |
| 10745323         | Wsb1                    | 10                            | 11.8                           | 1.8                                    | 0.001169       |
| 10844339         | Slc25a25                | 8.9                           | 10.7                           | 1.8                                    | 0.001963       |
| 10761493         | Glt1d1                  | 6.7                           | 8.5                            | 1.8                                    | 0.014526       |
| 10923338         | Coq10b                  | 7.1                           | 8.7                            | 1.6                                    | 0.013637       |
| 10910376         | Cyp1a1                  | 7.5                           | 9.2                            | 1.6                                    | 0.039726       |
| 10733310         | Zfp354a                 | 7.6                           | 9.2                            | 1.6                                    | 0.004918       |
| 10726995         | Image 7460165           | 11.2                          | 12.7                           | 1.6                                    | 0.01319        |
| 10726991         | Image 7460165           | 12.1                          | 13.7                           | 1.5                                    | 0.02402        |
| 10849522         | Hdc                     | 6.5                           | 8                              | 1.5                                    | 0.00066        |
| 10807815         | Tat                     | 11.7                          | 13.2                           | 1.5                                    | 0.011687       |
| 10769476         | Atp1b1                  | 9                             | 10.5                           | 1.5                                    | 0.003012       |
| 10788198         | Slc25a4                 | 8.5                           | 10                             | 1.5                                    | 0.001899       |
| 10752148         | Abcc5                   | 8.6                           | 10                             | 1.4                                    | 0.022451       |
| 10901910         | Amdhd1                  | 8.6                           | 10                             | 1.4                                    | 0.036212       |
| 10771492         | RGD1562220              | 8.1                           | 9.5                            | 1.4                                    | 0.00025        |
| 10878938         | Plk3                    | 7.4                           | 8.7                            | 1.4                                    | 0.023968       |
| 10906608         | Slc38a2                 | 10.4                          | 11.8                           | 1.4                                    | 0.001971       |
| 10734882         | Per1                    | 7.8                           | 9.1                            | 1.4                                    | 0.003983       |
| 10839771         | Slc20a1                 | 9.1                           | 10.3                           | 1.2                                    | 0.010489       |
| 10761162         | Por                     | 10                            | 11.2                           | 1.2                                    | 0.020945       |
| 10760131         | Cyp3a23                 | 11.7                          | 12.9                           | 1.2                                    | 0.001305       |
| 10710295         | Acsm3                   | 9.4                           | 10.6                           | 1.2                                    | 0.020938       |
| 10940599         | Alas1                   | 10.9                          | 12.1                           | 1.2                                    | 0.004876       |
| 10757962         | Asl                     | 10.8                          | 11.9                           | 1.2                                    | 0.018271       |
| 10879516         | Mfsd2                   | 9.6                           | 10.7                           | 1.1                                    | 0.043983       |
| 10929842         | Per2                    | 7.4                           | 8.5                            | 1.1                                    | 0.032426       |
| 10865077         | Lrtm2                   | 7.1                           | 8.1                            | 1.1                                    | 0.006581       |
| 10705276         | Cyp2a3a                 | 7.4                           | 8.4                            | 1.1                                    | 0.002443       |
| 10909411         | Usp2                    | 8.1                           | 9.2                            | 1                                      | 0.007085       |
| 10855853         | Ppm1k                   | 10.7                          | 11.7                           | 1                                      | 0.011481       |

|          |                    |      |      |      |          |
|----------|--------------------|------|------|------|----------|
| 10833635 | Slc16a10           | 9.3  | 10.3 | 1    | 0.010252 |
| 10726824 | Slc25a22           | 10.5 | 11.6 | 1    | 0.002052 |
| 10776954 | Rell1              | 7.8  | 8.8  | 1    | 0.010707 |
| 10817547 | Hfe2               | 9.9  | 8.9  | -1   | 0.001971 |
| 10771993 | Ugt2b34            | 10.3 | 9.3  | -1   | 0.017321 |
| 10800696 | Lims2              | 9.4  | 8.3  | -1   | 0.000105 |
| 10813253 | C6                 | 10.8 | 9.8  | -1   | 0.000417 |
| 10714782 | Mbl2               | 11.8 | 10.8 | -1   | 0.010633 |
| 10830554 | Cd164              | 12   | 11   | -1   | 0.007879 |
| 10926681 | ENSRNOG00000045232 | 7.6  | 6.5  | -1   | 0.0113   |
| 10901166 | Angptl4            | 9.1  | 8.1  | -1   | 0.014855 |
| 10859527 | Slco1b2            | 12.4 | 11.4 | -1   | 0.011578 |
| 10711210 | Hsd3b7             | 10.2 | 9.2  | -1   | 0.003088 |
| 10781581 | Tsc22d1            | 10.4 | 9.3  | -1   | 0.042016 |
| 10848030 | Bbox1              | 10.5 | 9.4  | -1   | 0.032203 |
| 10755088 | Rtp4               | 6.7  | 5.6  | -1.1 | 0.01464  |
| 10775761 | Ccng2              | 8    | 7    | -1.1 | 0.008175 |
| 10858160 | LOC500300          | 10   | 8.9  | -1.1 | 0.044179 |
| 10877907 | Adfp               | 10.1 | 9    | -1.1 | 0.005192 |
| 10744370 | Slc16a13           | 7.9  | 6.8  | -1.1 | 0.004198 |
| 10787507 | Pgpep1             | 9.3  | 8.2  | -1.1 | 0.00007  |
| 10768249 | Cfhl1              | 10.2 | 9.2  | -1.1 | 0.018359 |
| 10765280 | Dpt                | 10.7 | 9.7  | -1.1 | 0.043737 |
| 10733690 | Gm2a               | 11.8 | 10.7 | -1.1 | 0.000487 |
| 10865329 | Apobec1            | 8.3  | 7.2  | -1.1 | 0.037658 |
| 10806200 | NM_001103359       | 11.1 | 10   | -1.1 | 0.018416 |
| 10906285 | Tymp               | 11.4 | 10.3 | -1.1 | 0.006857 |
| 10793310 | Srd5a1             | 11.7 | 10.6 | -1.1 | 0.02532  |
| 10930675 | Es1                | 9.8  | 8.7  | -1.1 | 0.000271 |
| 10837366 | Slc43a3            | 10.4 | 9.3  | -1.1 | 0.022214 |
| 10831595 | Psmb8              | 8.7  | 7.6  | -1.1 | 0.00294  |
| 10710752 | Aqp8               | 12   | 10.9 | -1.1 | 0.000239 |
| 10933920 | RGD1565785         | 6.1  | 5    | -1.1 | 0.030331 |
| 10783977 | Cbln3              | 8.8  | 7.6  | -1.1 | 0.005194 |
| 10777037 | Slc34a2            | 9.3  | 8.1  | -1.1 | 0.01605  |
| 10933408 | RGD1563952         | 8.6  | 7.5  | -1.1 | 0.027926 |
| 10745994 | RGD1311564         | 9.6  | 8.5  | -1.1 | 0.004008 |
| 10795291 | Hist1h1b           | 9.2  | 8    | -1.2 | 0.032205 |
| 10742348 | Irgm               | 9.1  | 7.9  | -1.2 | 0.002782 |
| 10818262 | Slc16a4            | 9.4  | 8.2  | -1.2 | 0.000362 |
| 10752303 | Comt               | 12.3 | 11.1 | -1.2 | 0.016557 |
| 10932410 | Ebp                | 11   | 9.8  | -1.2 | 0.038218 |

|          |            |      |      |      |          |
|----------|------------|------|------|------|----------|
| 10795218 | Slc17a3    | 11.4 | 10.2 | -1.2 | 0.006964 |
| 10722718 | cdna       | 9.4  | 8.2  | -1.2 | 0.002818 |
| 10705223 | Cyp2b3     | 12.8 | 11.6 | -1.2 | 0.007661 |
| 10806229 | Es1        | 12.4 | 11.2 | -1.2 | 0.049603 |
| 10721871 | Fgf21      | 8.5  | 7.3  | -1.2 | 0.034715 |
| 10903053 | Inhbc      | 10.4 | 9.2  | -1.2 | 0.031163 |
| 10886611 | LOC299282  | 11.6 | 10.4 | -1.2 | 0.001617 |
| 10854482 | Tmem140    | 9.6  | 8.4  | -1.2 | 0.009438 |
| 10711566 | Htra1      | 9.8  | 8.5  | -1.2 | 0.01501  |
| 10924274 | Pnkd       | 10   | 8.8  | -1.2 | 0.001461 |
| 10828827 | Cdkn1a     | 9.3  | 8    | -1.3 | 0.032107 |
| 10702955 | RGD1562948 | 9.2  | 7.9  | -1.3 | 0.023445 |
| 10875863 | Pnrc1      | 11.2 | 9.9  | -1.3 | 0.023175 |
| 10824439 | Efna1      | 10.4 | 9.1  | -1.3 | 0.023337 |
| 10922745 | Npas2      | 8.7  | 7.4  | -1.3 | 0.000719 |
| 10800434 | Rnf125     | 10.1 | 8.8  | -1.3 | 0.04706  |
| 10794779 | RGD1310224 | 11.1 | 9.8  | -1.3 | 0.002057 |
| 10878170 | Cyp2j3     | 10.9 | 9.6  | -1.3 | 0.01384  |
| 10828357 | Psmb9      | 8.4  | 7.1  | -1.3 | 0.005072 |
| 10771965 | Ugt2b5     | 9.4  | 8.1  | -1.3 | 0.034168 |
| 10778254 | Gck        | 8    | 6.7  | -1.3 | 0.021114 |
| 10808302 | Osgin1     | 9.3  | 7.9  | -1.3 | 0.001511 |
| 10727438 | RGD1307603 | 12.5 | 11.2 | -1.4 | 0.001151 |
| 10814528 | Tnfsf10    | 9.2  | 7.8  | -1.4 | 0.012033 |
| 10923432 | Aox3       | 9.6  | 8.2  | -1.4 | 0.008707 |
| 10730898 | Gpam       | 11.5 | 10.1 | -1.4 | 0.001714 |
| 10710258 | Acsm2      | 10.4 | 9    | -1.4 | 0.045482 |
| 10894582 | Aldh1l2    | 9.8  | 8.3  | -1.4 | 0.00182  |
| 10799337 | LOC364773  | 7    | 5.6  | -1.4 | 0.01669  |
| 10749874 | Gbe1       | 10.7 | 9.3  | -1.4 | 0.006925 |
| 10719937 | cdna       | 10.8 | 9.4  | -1.4 | 0.003379 |
| 10705235 | Cyp2b3     | 10.8 | 9.4  | -1.4 | 0.003379 |
| 10754179 | Popdc2     | 8.3  | 6.8  | -1.4 | 0.049985 |
| 10895747 | Avpr1a     | 11.7 | 10.3 | -1.4 | 0.00236  |
| 10819500 | cdna       | 8.5  | 7.1  | -1.5 | 0.003618 |
| 10907542 | Csad       | 11.3 | 9.8  | -1.5 | 0.002004 |
| 10832378 | Lss        | 9.9  | 8.4  | -1.5 | 0.038736 |
| 10824409 | ncrna      | 9.2  | 7.6  | -1.6 | 0.039699 |
| 10751931 | Bcl6       | 9.2  | 7.6  | -1.6 | 0.012796 |
| 10863688 | RGD1561619 | 8.8  | 7.2  | -1.6 | 0.014223 |
| 10702945 | Acat2      | 9.5  | 7.8  | -1.6 | 0.04169  |
| 10822242 | Car3       | 12.3 | 10.6 | -1.6 | 0.004845 |
| 10804288 | Spink3     | 9    | 7.4  | -1.6 | 0.022506 |

|          |           |      |      |      |          |
|----------|-----------|------|------|------|----------|
| 10712706 | Chka      | 9.4  | 7.8  | -1.7 | 0.001343 |
| 10800919 | Egr1      | 9.7  | 8    | -1.7 | 0.021821 |
| 10891991 | Serpina3k | 13.6 | 11.8 | -1.8 | 0.013974 |
| 10733056 | Ifi47     | 9.9  | 8.1  | -1.8 | 0.009077 |
| 10728123 | Tm7sf2    | 10.2 | 8.4  | -1.8 | 0.021315 |
| 10903048 | Inhbe     | 9.5  | 7.6  | -1.9 | 0.00452  |
| 10801975 | MGC108823 | 6.8  | 4.8  | -2   | 0.001644 |
| 10912305 | Paqr9     | 11.2 | 9.2  | -2   | 0.003411 |
| 10894606 | Slc41a2   | 10.3 | 8.2  | -2   | 0.011889 |
| 10710028 | Arntl     | 9    | 6.9  | -2.1 | 0.011631 |
| 10930766 | Cyp2c12   | 13   | 10.9 | -2.1 | 0.026897 |
| 10841348 | Acss2     | 10.4 | 8.1  | -2.3 | 0.033097 |
| 10775731 | Cxcl13    | 9    | 6.7  | -2.3 | 0.004889 |
| 10702695 | Esr1      | 8.2  | 5.9  | -2.3 | 0.001544 |
| 10732239 | Igfals    | 10.7 | 8.4  | -2.3 | 0.000743 |
| 10803692 | Nrep      | 11   | 8.5  | -2.5 | 0.000089 |
| 10834022 | Arrdc3    | 11.8 | 9.1  | -2.7 | 0.000599 |
| 10854427 | Akr1b7    | 9.7  | 6.9  | -2.9 | 0.002169 |
| 10763758 | Pigr      | 11.8 | 8.9  | -2.9 | 0.00606  |
| 10719187 | Sult2a1   | 10.4 | 7.3  | -3.1 | 0.030156 |
| 10730013 | Cyp2c7    | 11   | 7.7  | -3.4 | 0.009484 |

Probesets have been screened for the following criteria: a minimum of 1 or greater log base 2 difference (absolute value) between p21 Con versus p21 IPCR with a p-value less than 0.05 using an Welch modified two sample t-test (corresponds to a minimum of 100% increase or maximum 50% decrease as compared to Con samples); and mean expression greater than 6 (log base 2) in p21 Con samples. Genes are listed from most up-regulated (top of list) to most down-regulated (bottom of list).

<sup>a</sup> Gene symbol, gene locus, or RGD/IMAGE/Ensembl/Genbank accession number

<sup>b</sup> The group mean microarray signal intensity incorporating the three replicates is reported here

<sup>c</sup> Note data is log transformed and displayed as a power with a base of 2

**Supplementary Table S3. Probesets differentially expressed between d450 Con versus d450 IUCR.**

| <b>Probe set</b> | <b>Gene or locus<sup>a</sup></b> | <b>d450<br/>Con<br/>mean<sup>b,c</sup></b> | <b>d450<br/>IUCR<br/>mean<sup>b,c</sup></b> | <b>d450<br/>Con<br/>mean<sup>b,d</sup></b> | <b>d450<br/>Iucr<br/>mean<sup>b,d</sup></b> | <b>Percent<br/>difference<sup>e</sup></b> | <b>p-value</b> |
|------------------|----------------------------------|--------------------------------------------|---------------------------------------------|--------------------------------------------|---------------------------------------------|-------------------------------------------|----------------|
| 10939699         | Line 1 element                   | 7.7                                        | 8.6                                         | 213.8                                      | 382.7                                       | 79                                        | 0.024617       |
| 10771998         | RGD1559459                       | 8.6                                        | 9.4                                         | 382.7                                      | 670.9                                       | 75                                        | 0.017552       |
| 10715250         | Line 1 element                   | 8.9                                        | 9.7                                         | 487.8                                      | 849.2                                       | 74                                        | 0.036162       |
| 10930593         | tRNA-His                         | 9.5                                        | 10.2                                        | 709.2                                      | 1201                                        | 69                                        | 0.028747       |
| 10930604         | tRNA-Gln                         | 8.9                                        | 9.6                                         | 484.4                                      | 786.9                                       | 62                                        | 0.037453       |
| 10855946         | ncrna:ENSRNOG000000352           | 6.5                                        | 7.1                                         | 90.5                                       | 141                                         | 56                                        | 0.028046       |
| 10770313         | Cabc1                            | 10.8                                       | 11.5                                        | 1807.8                                     | 2797.7                                      | 55                                        | 0.027134       |
| 10924274         | Pnkd                             | 9.5                                        | 10.1                                        | 734.2                                      | 1128.4                                      | 54                                        | 0.019633       |
| 10855185         | Y3 small cytoplasmic RNA         | 9                                          | 9.6                                         | 494.6                                      | 749.6                                       | 52                                        | 0.034174       |
| 10930569         | tRNA-Met                         | 9.6                                        | 10.2                                        | 765.4                                      | 1144.1                                      | 49                                        | 0.025844       |
| 10924260         | Pnkd                             | 9.4                                        | 10                                          | 666.3                                      | 989.1                                       | 48                                        | 0.014247       |
| 10880562         | RGD1562033                       | 9.1                                        | 9.7                                         | 560.3                                      | 831.7                                       | 48                                        | 0.046231       |
| 10705411         | ENSRNOG00000037675               | 11.9                                       | 12.5                                        | 3875.1                                     | 5712.9                                      | 47                                        | 0.043911       |
| 10821067         | chr2:32877353-32915109           | 11.9                                       | 12.5                                        | 3875.1                                     | 5712.9                                      | 47                                        | 0.043911       |
| 10772272         | ENSRNOG000000039                 | 6.8                                        | 7.3                                         | 109.9                                      | 160.9                                       | 46                                        | 0.002622       |
| 10824788         | chr2:187300619-187301692         | 9.6                                        | 10.2                                        | 781.4                                      | 1136.2                                      | 45                                        | 0.016082       |
| 10838130         | Slc1a2                           | 7.7                                        | 8.3                                         | 212.3                                      | 308.7                                       | 45                                        | 0.03305        |
| 10938837         | ENSRNOG00000037905               | 7.1                                        | 7.6                                         | 136.2                                      | 195.4                                       | 43                                        | 0.018543       |
| 10763863         | Slc45a3                          | 7.5                                        | 8                                           | 179.8                                      | 257.8                                       | 43                                        | 0.024793       |
| 10882534         | RGD1311939                       | 8.5                                        | 9                                           | 367.1                                      | 526.4                                       | 43                                        | 0.007475       |
| 10721698         | ncrna:ENSRNOG00000035279         | 7.8                                        | 8.4                                         | 229.1                                      | 326.3                                       | 42                                        | 0.003869       |
| 10839771         | Slc20a1                          | 10.1                                       | 9.5                                         | 1097.5                                     | 714.1                                       | -35                                       | 0.0446         |
| 10760568         | LOC679750                        | 6.4                                        | 5.8                                         | 86.2                                       | 54.6                                        | -37                                       | 0.012841       |
| 10922931         | RGD1562818                       | 6.5                                        | 5.9                                         | 93.1                                       | 58.1                                        | -38                                       | 0.013312       |
| 10855862         | Abcg2                            | 7.9                                        | 6.9                                         | 230.7                                      | 119.4                                       | -48                                       | 0.038721       |
| 10752266         | IMAGE:6921248                    | 7.5                                        | 6.6                                         | 182.3                                      | 94.4                                        | -48                                       | 0.005557       |

Probesets have been screened for the following criteria: a minimum of 0.5 or greater log base 2 difference (absolute value) between d450 Con versus d450 IUCR with a p-value less than 0.05 using an Welch modified two sample t-test (corresponds to either a maximum 79% increase in expression or 48% decrease in expression as compared to control samples); mean expression greater than 6 (log base 2) in d450 Con samples; and accessioned genes through either RGD, Image, Ensembl, or PubMed. Genes are listed from most up-regulated (top of list) to most down-regulated (bottom of list).

<sup>a</sup> Gene symbol, gene locus, or RGD/IMAGE/Ensembl/Genbank accession number

<sup>b</sup> The group mean microarray signal intensity incorporating the three replicates is reported here.

<sup>c</sup> Note data is log transformed and displayed as a power with a base of 2.

<sup>d</sup> Data expressed linear (not log transformed)

<sup>e</sup> Percent difference is calculated from the linear data

**Supplementary Table S4. Probesets differentially expressed between d450 Con versus d450 IPCR.**

| Probe set | Gene <sup>a</sup>        | d450<br>Con <sup>b,c</sup> | d450<br>IPCR <sup>b,c</sup> | Difference<br>of means <sup>c</sup> | p value  |
|-----------|--------------------------|----------------------------|-----------------------------|-------------------------------------|----------|
| 10930602  | tRNA-thr                 | 5.8                        | 7.3                         | 1.5                                 | 0.030776 |
| 10776209  | ENSRNOG00000039301       | 10.2                       | 11.5                        | 1.3                                 | 0.01185  |
| 10875324  | Cyp7a1                   | 10                         | 11.3                        | 1.3                                 | 0.038971 |
| 10930555  | tRNA-phe                 | 6.7                        | 7.9                         | 1.2                                 | 0.010012 |
| 10832563  | Gstt3                    | 8.8                        | 9.9                         | 1.1                                 | 0.004823 |
| 10897360  | Gpt                      | 9.1                        | 10.2                        | 1.1                                 | 0.035002 |
| 10923432  | Aox3                     | 9.8                        | 10.8                        | 1.1                                 | 0.024205 |
| 10935693  | chrX:152771705-152771745 | 12                         | 11                          | -1                                  | 0.014593 |
| 10752266  | RGD1564318               | 7.5                        | 6.5                         | -1                                  | 0.00544  |
| 10939615  | ENSRNOG00000037531       | 12.2                       | 11.1                        | -1                                  | 0.015005 |
| 10924441  | ENSRNOG00000037792       | 10.8                       | 9.8                         | -1.1                                | 0.000569 |
| 10868796  | chr5:62428918-62429008   | 10.5                       | 9.4                         | -1.1                                | 0.010987 |
| 10791650  | ENSRNOG00000030037       | 13                         | 11.9                        | -1.1                                | 0.026372 |
| 10918480  | ENSRNOG00000006879       | 9.9                        | 8.8                         | -1.1                                | 0.000226 |
| 10939888  | ENSRNOG00000037431       | 9.3                        | 8.1                         | -1.2                                | 0.003482 |
| 10821115  | chr2:34010638-34010676   | 11.1                       | 9.8                         | -1.3                                | 0.012014 |
| 10851484  | Jph2                     | 10.6                       | 9.3                         | -1.4                                | 0.001033 |
| 10923393  | Aox1                     | 10.9                       | 9.6                         | -1.4                                | 0.006587 |
| 10802970  | ENSRNOG00000034905       | 11.4                       | 10                          | -1.4                                | 0.01462  |
| 10780173  | TCR alpha joining region | 10.7                       | 9.3                         | -1.4                                | 0.000576 |
| 10742402  | Ltc4s                    | 9.1                        | 7.7                         | -1.4                                | 0.002053 |
| 10912908  | Cish                     | 9.3                        | 7.8                         | -1.4                                | 0.031377 |

Probesets have been screened for the following criteria: a minimum of 1 or greater log base 2 difference (absolute value) between d450 Con versus d450 IPCR with a p-value less than 0.05 using an Welch modified two sample t-test (corresponds to either a minimum 100% increase in expression or a maximum 50% decrease in expression as compared to control samples); mean expression greater than 6 (log base 2) in d450 Con samples; and accessioned genes through either RGD, Image, Ensembl, or PubMed. Genes are listed from most up-regulated (top of list) to most down-regulated (bottom of list).

<sup>a</sup> Gene symbol, gene locus, or RGD/IMAGE/Ensembl/Genbank accession number

<sup>b</sup> The group mean microarray signal intensity incorporating the three replicates is reported here

<sup>c</sup> Note data is log transformed and displayed as a power with a base of 2



p21 Con A  
p21 Con B  
p21 Con C  
p21 IPCR A  
p21 IPCR B  
p21 IPCR C

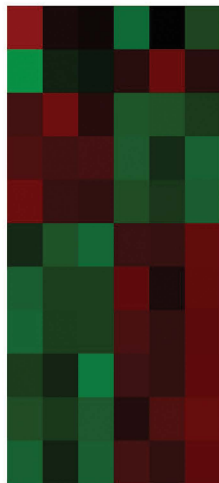

-3.0 -1.5 0 1.5 3.0

Nr1f1  
Nr1d1  
Clock  
Arntl  
Npas2  
Per1  
Per2  
Per3  
Cry1  
Cry2  
Ccrn4lb

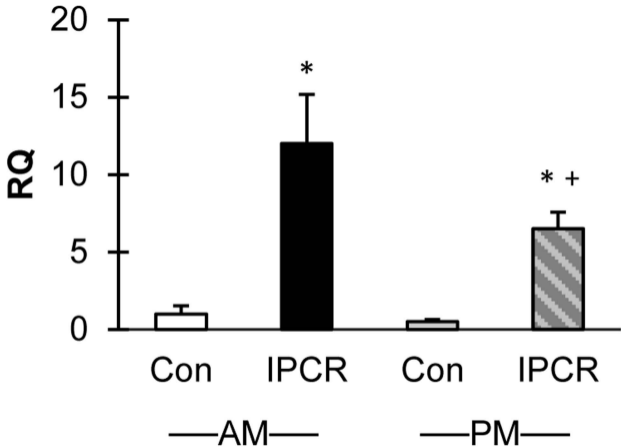

p21 Con A  
p21 Con B  
p21 Con C  
p21 IPCR A  
p21 IPCR B  
p21 IPCR C

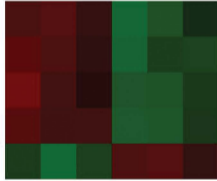

-3.0 -1.8 -0.6 0.6 1.8 3.0

Ghr  
Stat5b  
Igf1  
Igfals  
Igfbp2

d450 Con A  
d450 Con B  
d450 Con C  
d450 IUCR A  
d450 IUCR B  
d450 IUCR C  
d450 IPCR A  
d450 IPCR B  
d450 IPCR C

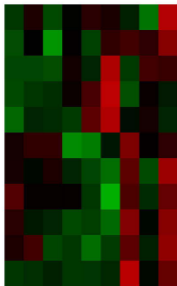

Nr1f1  
Nr1d1  
Clock  
Arntl  
Npas2  
Per1  
Per2  
Per3  
Cry1  
Cry2  
Ccrn4lb

-3.0 -2.3 -1.7 -1.0 -0.3 0.3 1.0 1.7 2.3 3.0
